# Supplementary material for: Metabolomic signature of the maternal microbiota in the fetus
Source: bioRxiv or medRxiv preprint supplement (doi:10.1101/2020.09.28.317081), 2021-06-18
Supplement: Supplementary file [file media-1.pdf]

# Supplementary info for: Metabolomic signature of the maternal microbiota in the fetus

Tiina Pessa-Morikawa Tiina, Aleksi Husso, Olli Kärkkäinen, Ville Koistinen, Antti Iivanainen & Mikael Niku

Corresponding author: Mikael Niku, [mikael.niku@helsinki.fi](mailto:mikael.niku@helsinki.fi)

## Supplementary results

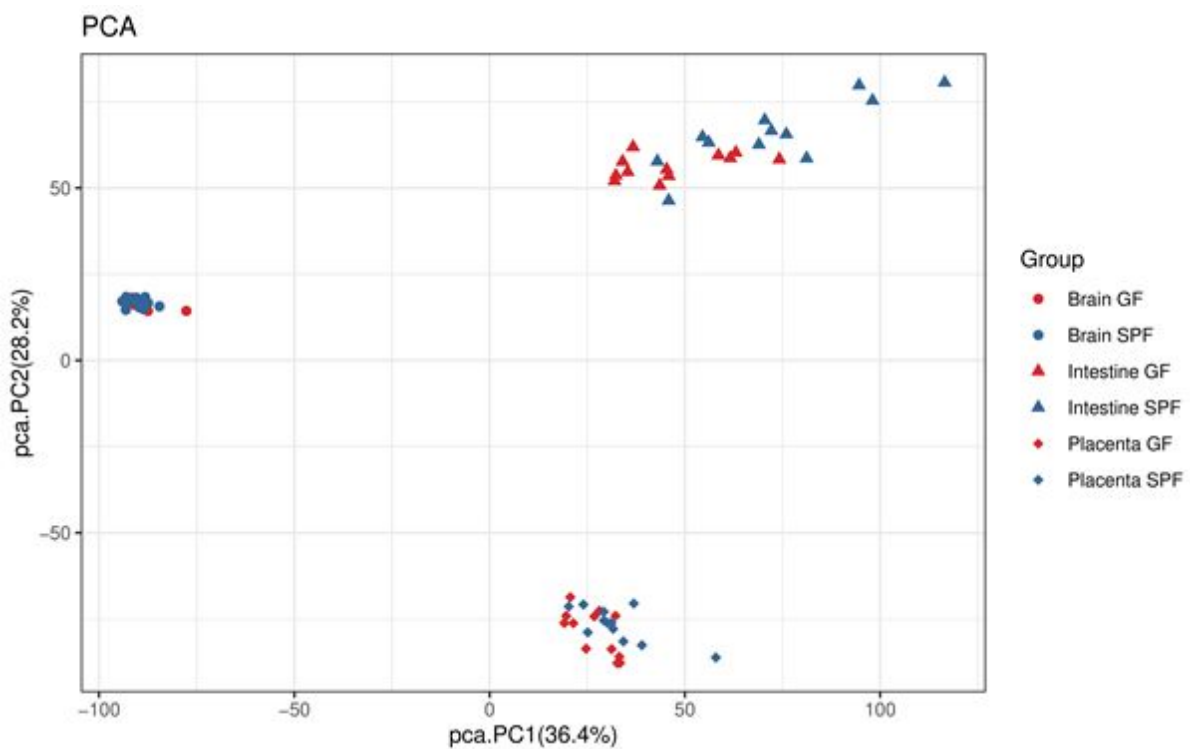

**SUPPLEMENTARY Figure 1.** Principal component analysis (PCA) of the metabolite profiles of each sample. Component 1 (x axis) explains 36.4% of the variation between the samples and component 2 (y axis) explains 28.2% of the between-samples variation.
